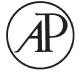

## Erratum

ICES Journal of Marine Science, 57: 919–926. 2000

Acoustic estimation of longline tuna abundance

A. Bertrand and E. Josse

It is regretted that the sentence:

“There are many possible fields of application: it can improve stock management and fishing by allowing the exploitation of new areas or depth layers . . .” should read:

“Fields of application are numerous. It can improve stock management but also fishing activities (or selectivity) by watching the exploitation of new areas or depth layers.”
